# Supplementary material
Source: PubMed Central journal article supplement (PMC6878762)
Supplement: NIHMS1056728-supplement-SI.pdf [file NIHMS1056728-supplement-SI.pdf]

## Supplementary Information

### Structural basis of highly conserved ribosome recycling in eukaryotes and archaea

Thomas Becker<sup>1\*§</sup>, Sibylle Franckenberg<sup>1\*</sup>, Stephan Wickles<sup>1</sup>, Christopher J. Shoemaker<sup>2</sup>, Andreas M. Anger<sup>1</sup>, Jean-Paul Armache<sup>1</sup>, Heidemarie Sieber<sup>1</sup>, Charlotte Ungewickell<sup>1</sup>, Otto Berninghausen<sup>1</sup>, Ingo Daberkow<sup>3</sup>, Annette Karcher<sup>1,5</sup>, Michael Thomm<sup>4</sup>, Karl-Peter Hopfner<sup>1</sup>, Rachel Green<sup>2</sup> and Roland Beckmann<sup>1§</sup>

## Supplementary Information

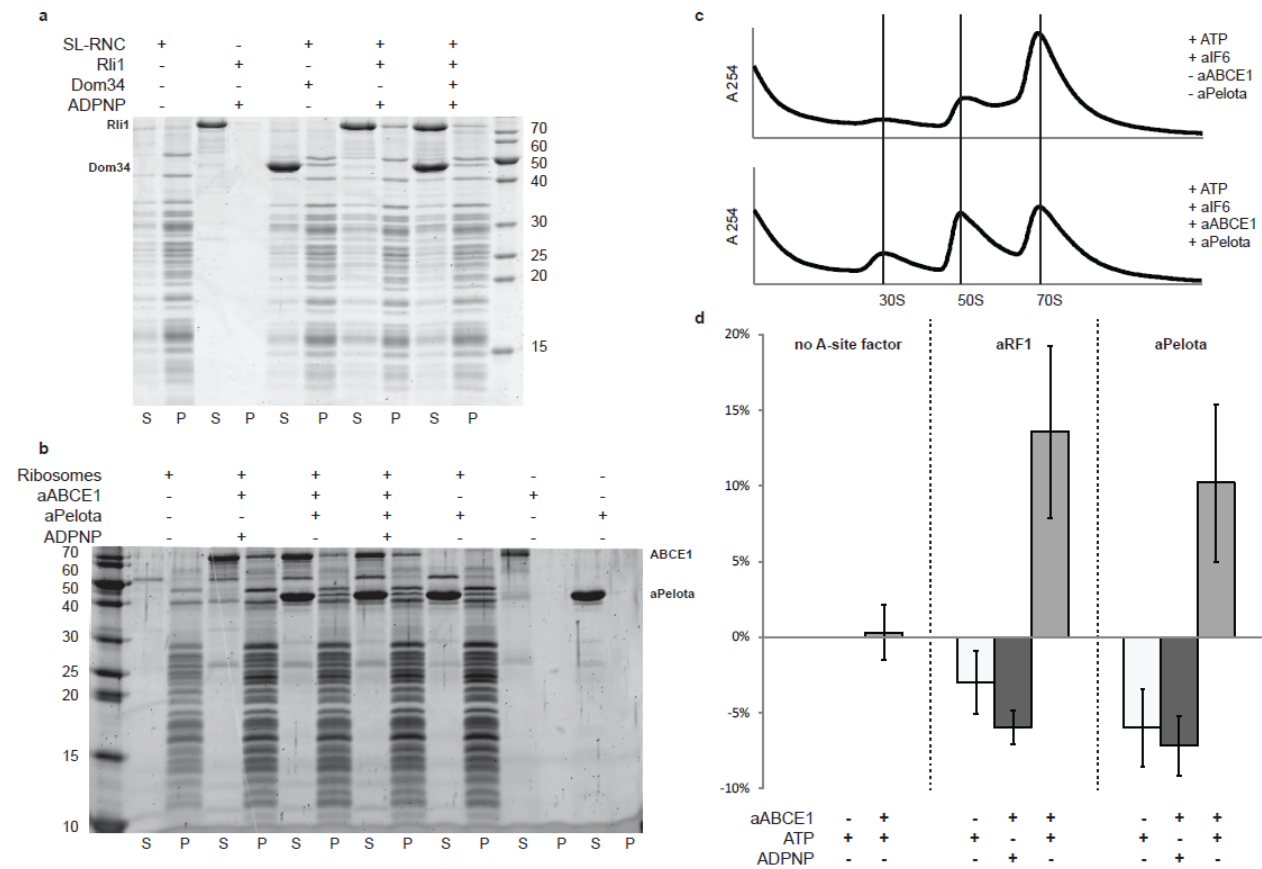

**Suppl. Fig. 1:** *In vitro* ribosome binding of Pelota and ABCE1 and ribosomal splitting.

(a) Purified Dom34 and Rli1 were bound to yeast SL-RNCs in the presence of ADPNP. (b) aPelota and aABCE1 were bound to archaeal 70S ribosomes. Reactions were spun through a sucrose cushion. Supernatant (S) and pellet (P) fractions were analyzed by SDS-PAGE and stained with SYPRO Orange. Binding of Pelota and ABCE1 alone as well as in combination is detectable in both, *S. cerevisiae* and *P. furiosus*. (c) Dissociation by aABCE1, aPelota and aIF6 compared with factor-independent dissociation of 70S archaeal ribosomes assayed by sucrose density centrifugation. (d) Splitting efficiency of aABCE1, aRF1 or aPelota and different nucleotides for archaeal 70S ribosomes. Error bars indicate +/- standard deviation. aIF6 was added to prevent reassembly of free subunits.

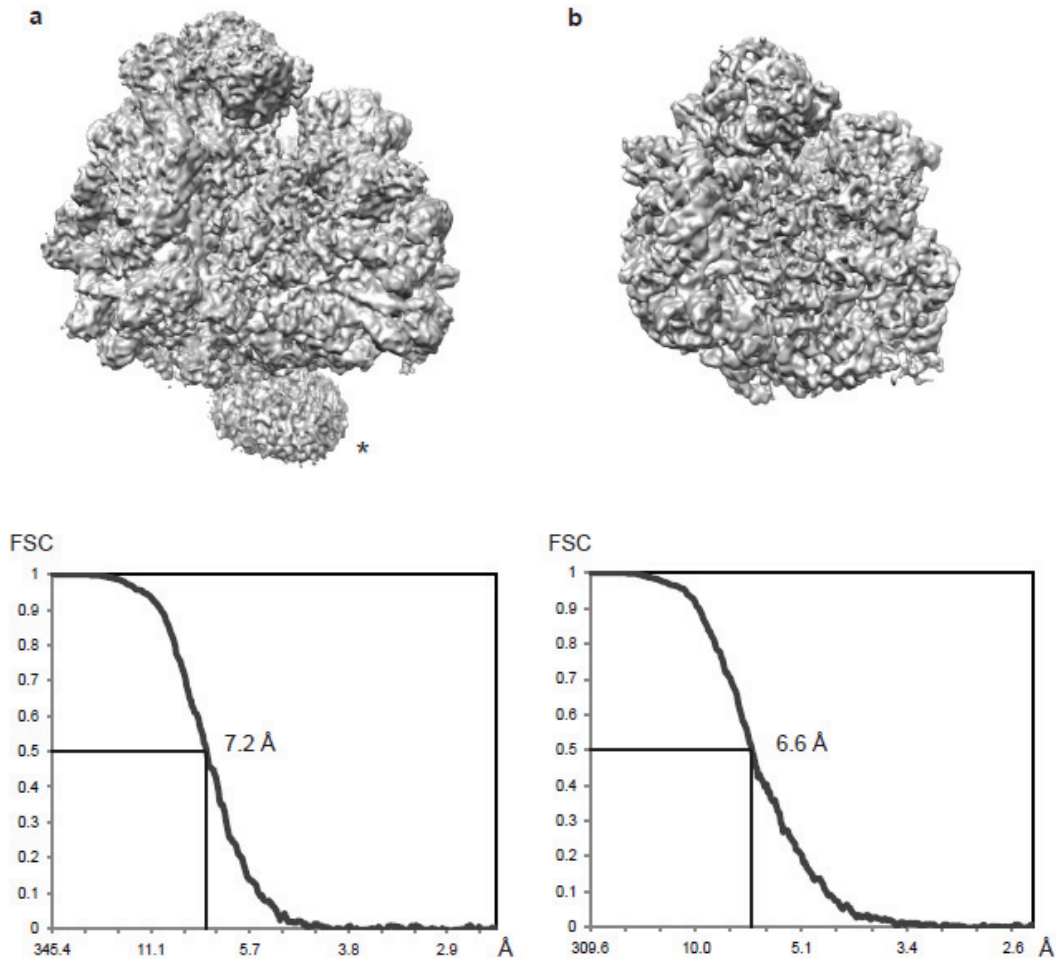

**Suppl. Fig. 2:** Cryo-EM reconstructions and resolution.

Cryo-EM maps of the yeast SL-RNC-Dom34-Rli1 complex (**a**) and the archaeal 70S aPelota-aABCE1 complex (**b**) at a resolution of 7.2 and 6.6 Å, respectively, according to a FSC at a cutoff value of 0.5. For the yeast SL-RNC complex mammalian Sec61 (mSec61; indicated with an asterisk) is visible at the exit site. mSec61 was used to prevent orientational bias of the particles on the cryo-EM grid.

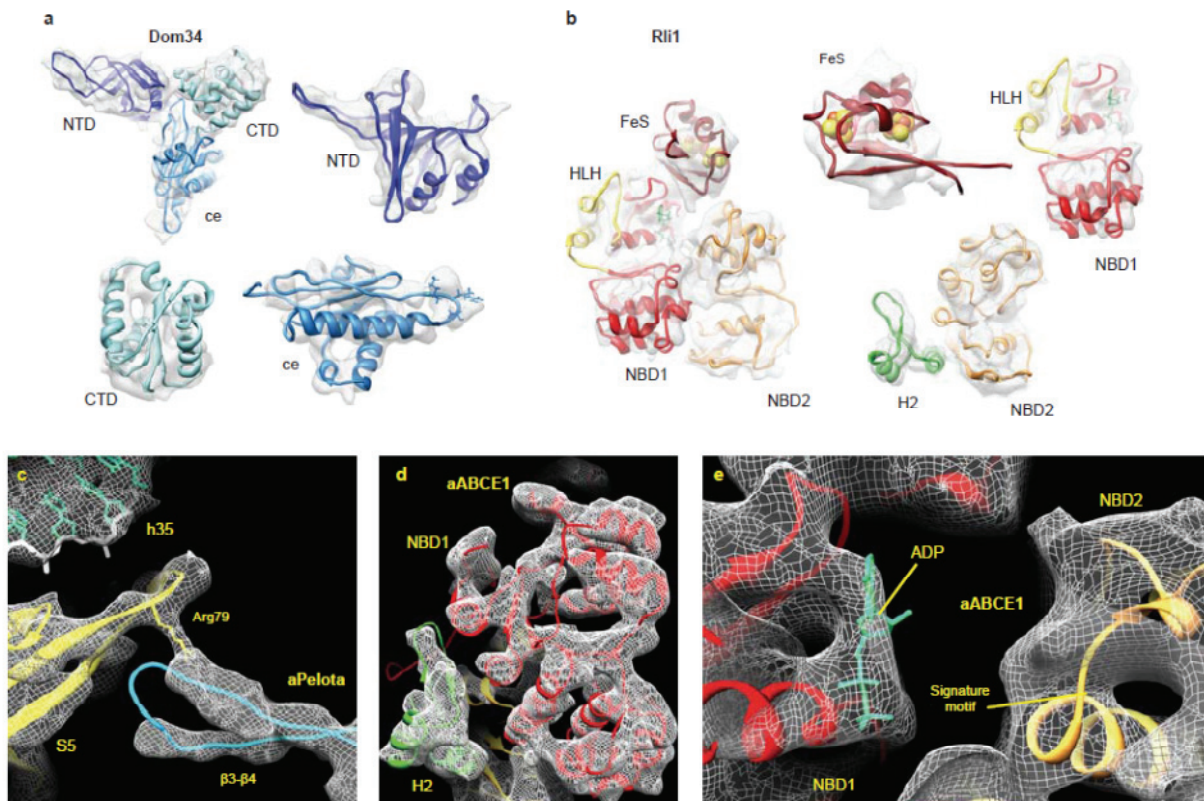

**Suppl. Fig. 3:** Fitting of Pelota and ABCE1 domains.

(a, b) Homology models of *S. cerevisiae* Dom34 and Rli1 fitted into isolated cryo-EM densities (transparent mesh). (c) Homology models for *T. kodakarensis* aPelota, rRNA and ribosomal protein S5 fitted into isolated cryo-EM densities showing the contact between aPelota and S5 formed by Arg79 (NTD blue, S5 yellow, rRNA green-white). (d, e) Crystal structure of aABCE1 fitted into isolated cryo-EM density (NBD1 red, hinge 2 domain green, NBD2 yellow)<sup>6</sup>. (d) View focusing on NBD1 and hinge domain 2 (H2). (e) View focusing on the nucleotide binding site of NBD1 (ADP green).

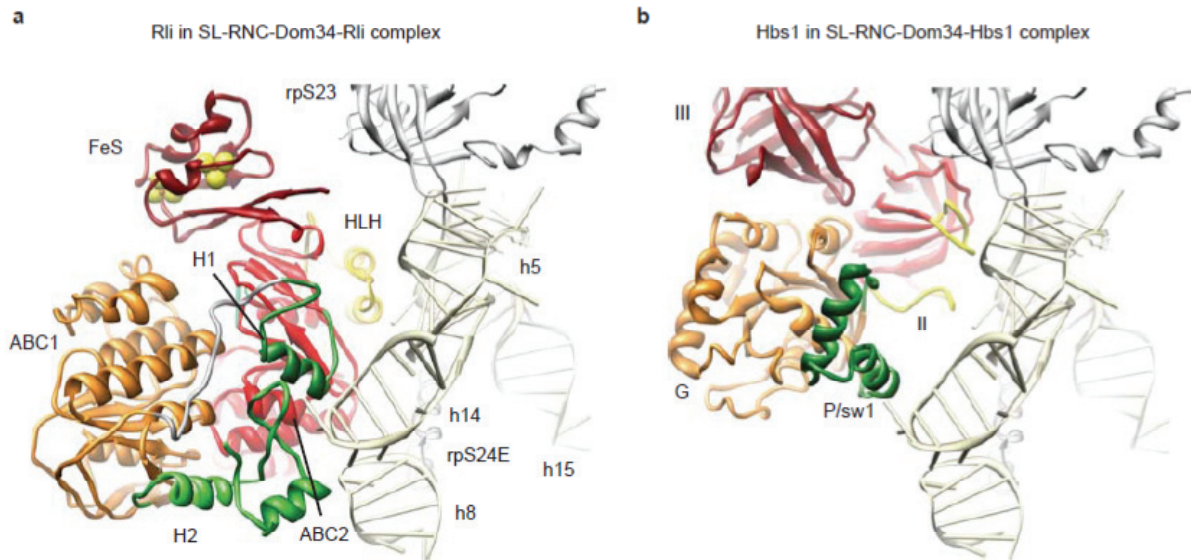

**Suppl. Fig. 4:** Comparison of Rli1 binding with Hbs1 binding to the 40S subunit.

The Rli1 helix-loop-helix motif (HLH; yellow) binds to rRNA helices h5 and h15 that are bound by domain II of Hbs1<sup>19</sup> (red; residues interacting with rRNA in yellow). The Rli1 hinge domain (H1, H2; green) binds to the rRNA h8-h14 junction that is contacted by the P-loop/switch1-loop region of Hbs1 (P/sw1; green). The color code of Rli1 is as in **Fig. 1c**, Hbs1 G-domain is shown in orange, domain II in red and domain III in dark red, rRNA in pale yellow and ribosomal proteins in grey.



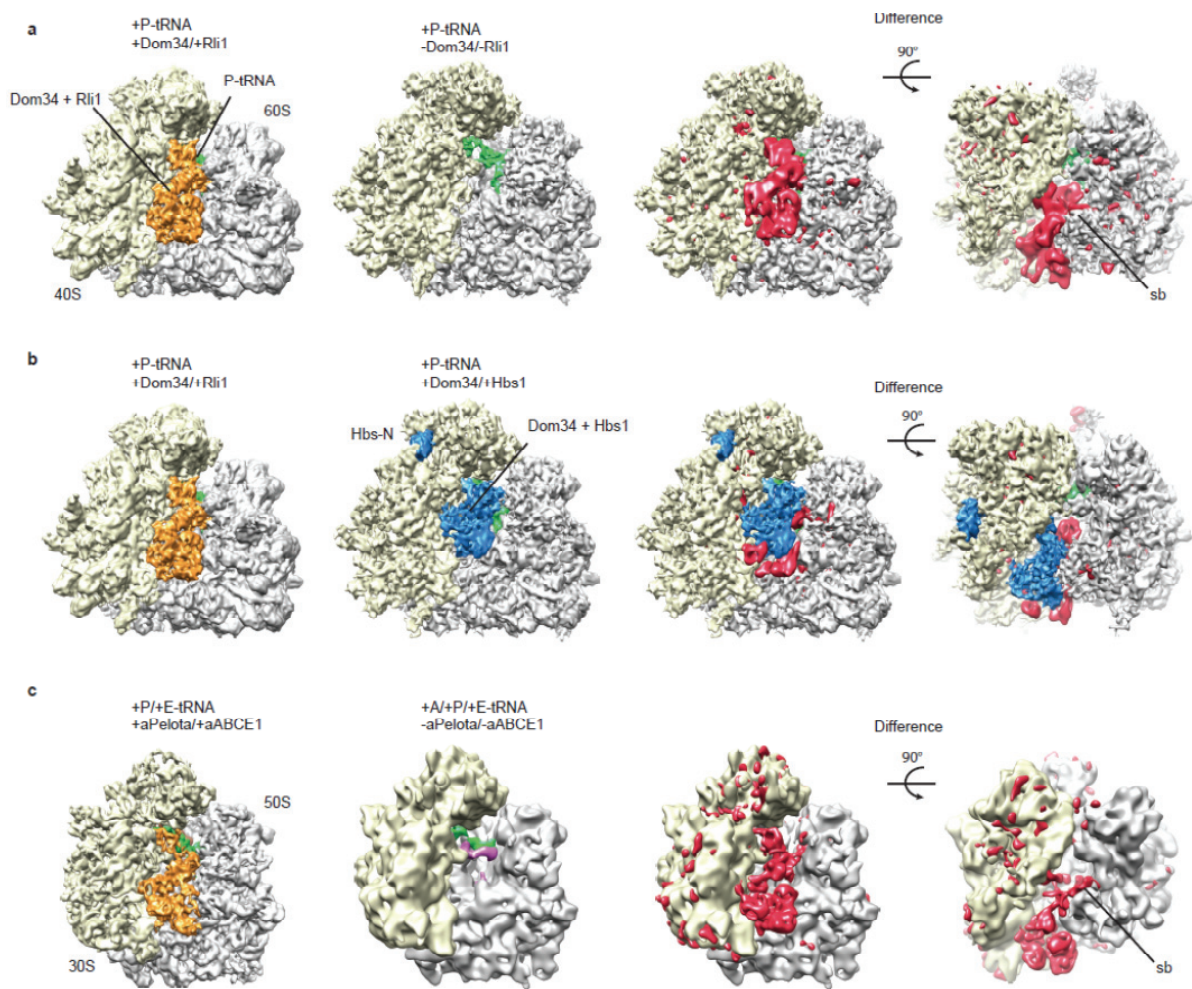

**Suppl. Fig. 5:** Difference maps.

(a) Cryo-EM maps for the yeast SL-RNC-Dom34-Rli1 complex, a vacant SL-RNC (middle) and the difference map (side and top views) overlaid upon the SL-RNC map. (b) Cryo-EM maps for the SL-RNC-Dom34-Rli1 complex, the SL-RNC-Dom34-Hbs1 complex<sup>19</sup> and the difference map (side and top view). (c) Cryo-EM maps for the archaeal 70S-aPelota-aABCE1 complex, the 70S ribosome with A-, P- and E-site tRNA and the difference map (side and top view). Note that the stalk base (sb) is moved inwards upon Dom34-Rli1/aPelota-ABCE1 binding as observed for binding of Dom34-Hbs1. The small ribosomal subunits are colored in pale yellow, large subunits in grey, Dom34-Rli1/aPelota-aABCE1 density in orange, Dom34-Hbs1 density in blue, P-site tRNA density in green, A-site tRNA density in purple and difference densities in red.

**Suppl. Table 1:** Contacts between Dom34 and Rli1 with the ribosome and with each other. Known mutations of or in direct neighborhood to contacting residues in Dom34 and Rli1 and their effects are given.

| Ribosome |           | Dom34  |         | Mutation |          |
|----------|-----------|--------|---------|----------|----------|
| Protein  | Residue   | Domain | Residue | Residue  | Effect * |
| LSU      | rpL12/L11 | CTD    | 311-312 |          |          |
| SSU      | rpS30e    | NTD    | 77-78   |          |          |

  

| Ribosome |            | Dom34           |                    | Mutation                                                                             |                                                                    |      |
|----------|------------|-----------------|--------------------|--------------------------------------------------------------------------------------|--------------------------------------------------------------------|------|
| RNA      | Nucleotide | Domain          | Residue            | Residue                                                                              | Effect *                                                           |      |
| LSU      | H43        | CTD             | 345                |                                                                                      |                                                                    |      |
|          | H44        | CTD             | 373-375            |                                                                                      |                                                                    |      |
|          | H69        | ce              | 255-256            |                                                                                      |                                                                    |      |
|          | H69        | NTD             | 113                |                                                                                      |                                                                    |      |
|          | H71        | ce              | 175                | 174KKK176 to 174AAA176 <sup>58,59</sup>                                              | +                                                                  |      |
|          | H89        | 2850-2852       | ce                 | 232, 235, 243                                                                        |                                                                    |      |
|          |            | 2839-2840       | ce                 | 237, 241                                                                             |                                                                    |      |
|          |            | 2842            | ce                 | 286                                                                                  |                                                                    |      |
|          | H92        | 2926-2927       | ce                 | 218                                                                                  | G217Y <sup>32</sup> , 216PGF218 to 216AAA218 <sup>58</sup>         | +, + |
|          | H95        | 3027            | CTD                | 288-293                                                                              |                                                                    |      |
| SSU      | h18        | NTD             | 47, 49-52, 103-104 | F47A <sup>32</sup> , Δ(F47-T60) <sup>32</sup> , 49SKLDF53 to 49AAAAA53 <sup>58</sup> | ++, +                                                              |      |
|          | h28        | NTD             | 56-57              | Δ(F47-T60) <sup>32</sup>                                                             | ++                                                                 |      |
|          | h31        | 1182-1185       | NTD                | 9-11                                                                                 |                                                                    |      |
|          |            | 1179, 1188-1189 | NTD                | 91-92, 94-95                                                                         | (D90-P100)A <sup>32</sup> , 87TVTDES92 to 87AAAAAA92 <sup>58</sup> | +, + |
|          | h34        | 1272-1274       | NTD                | 100-101                                                                              | (D90-P100)A <sup>32</sup>                                          | +    |
|          | h44        | 1756-1757       | NTD                | 113                                                                                  |                                                                    |      |

  

| tRNA     |         | Dom34  |                    | Mutation                                                                           |          |
|----------|---------|--------|--------------------|------------------------------------------------------------------------------------|----------|
| Position | Residue | Domain | Residue            | Residue                                                                            | Effect * |
| p-site   | 1, 71   | ce     | 177, 186-187       | 174KKK176 to 174AAA176 <sup>58,59</sup>                                            | +, -     |
|          | 65, 67  | ce     | 174, 178, 183, 186 | 174KKK176 to 174AAA176 <sup>58,59</sup> , 184FDEKT188 to 184AAAAA188 <sup>58</sup> | -        |

  

| Rli1   |         | Dom34  |         | Mutation               |          |
|--------|---------|--------|---------|------------------------|----------|
| Domain | Residue | Domain | Residue | Residue                | Effect * |
| FeS    | 63-64   | CTD    | 292-293 |                        |          |
| FeS    | 33      | CTD    | 300-302 | Y300A <sup>32,59</sup> | +        |
| FeS    | 27-28   | CTD    | 384-386 |                        |          |

| Ribosome |                     | Rli1    |        | Mutation      |                    |          |
|----------|---------------------|---------|--------|---------------|--------------------|----------|
|          | Protein             | Residue | Domain | Residue       | Residue            | Effect * |
| LSU      | rpL9                | 96-97   | NBD2   | 516           |                    |          |
|          | rpP0                | 145,147 | NBD2   | 432, 435, 439 |                    |          |
| SSU      | rpS6e <sup>23</sup> | 19, 107 | H2     | 587-592, 595  | S588E <sup>7</sup> | ++       |
|          | rpS24e              | 132-134 | NBD1   | 262           |                    |          |

| Ribosome |     | Rli1                |        | Mutation             |                    |          |
|----------|-----|---------------------|--------|----------------------|--------------------|----------|
|          | RNA | Nucleotide          | Domain | Residue              | Residue            | Effect * |
| LSU      | H95 | 3021-3025           | NBD2   | 445-446,<br>508-512  |                    |          |
|          |     | 3019-3020           | NBD1   | 337-338              |                    |          |
| SSU      | h5  | 51                  | HLH    | 148-151              | R148A <sup>7</sup> | -        |
|          | h8  | 155-157             | H2     | 582-585,<br>587-589  | S588E <sup>7</sup> | ++       |
|          | h14 | 416-417             | H1/H2  | 311, 580-582,<br>515 | R311E <sup>7</sup> | ++       |
|          | h15 | 429-430,<br>438-440 | HLH    | 146, 153-154         | L152E <sup>7</sup> | -        |

| Dom34  |         | Rli1   |         | Mutation            |          |
|--------|---------|--------|---------|---------------------|----------|
| Domain | Residue | Domain | Residue | Residue             | Effect * |
| CTD    | 292-293 | FeS    | 63-64   | C65A <sup>7,9</sup> | ++       |
| CTD    | 300-302 | FeS    | 33      |                     |          |
| CTD    | 384-386 | FeS    | 27-28   | C29A <sup>7,9</sup> | -        |

\* Effect reads as:      – no effect      + mild effect      ++ strong effect



**Suppl. Table 2:** Contacts of aPelota and aABCE1 with the ribosome and with each other. Known mutations of or in direct neighborhood to contacting residues in aPelota and aABCE1 and their effects are given.

| Ribosome |         | aPelota |         | Mutation   |                                                   |   |
|----------|---------|---------|---------|------------|---------------------------------------------------|---|
| Protein  | Residue | Domain  | Residue | Residue ** | Effect ***                                        |   |
| LSU      | L10e    | 100-106 | ce      | 174-176    | 174KKK176 to 174AAA176 <sup>58,59</sup> (174-176) | + |
|          | L11     | 18-24   | CTD     | 283-285    | Y300A <sup>32,59</sup> (283)                      | + |
| SSU      | S5      | 79      | NTD     | 48-49      | 49SKLDF53 to AAAA <sup>58</sup> (47-51)           | + |

  

| Ribosome |             | aPelota          |         | Mutation             |                                                                                                             |       |
|----------|-------------|------------------|---------|----------------------|-------------------------------------------------------------------------------------------------------------|-------|
| RNA      | Nucleotide* | Domain           | Residue | Residue **           | Effect ***                                                                                                  |       |
| LSU      | H43         | 1205-1207        | CTD     | 325-326              |                                                                                                             |       |
|          | H44         | 1234             | CTD     | 353,354              |                                                                                                             |       |
|          | H69         | 2038-2040        | ce      | 239-240, 243         |                                                                                                             |       |
|          | H72         | 2070-2071        | ce      | 207-208, 231-233     | G217Y <sup>32</sup> (208), 216PGF218 to 216AAA218 <sup>58</sup> (207-209)                                   | +, +  |
|          |             | 2087             | ce      | 235-236              |                                                                                                             |       |
|          | H89         | 2595             | ce      | 223                  |                                                                                                             |       |
|          | H95         | 2776             | CTD     | 272-273, 276         |                                                                                                             |       |
| SSU      | h18         | 470-472, 483-484 | NTD     | 42, 63-64, 68, 94-96 | (D90-P100)A <sup>32</sup> (90-104)                                                                          | +     |
|          | h28         | 1357             | NTD     | 46                   | F47A <sup>32</sup> (45), 49SKLDF53 to 49AAAAA53 <sup>58</sup> (47-51)                                       | ++, + |
|          | h31         | 916              | NTD     | 9                    |                                                                                                             |       |
|          | h34         | 1004-1006, 1156  | NTD     | 46, 94-96            | F47A <sup>32</sup> (45), 49SKLDF53 to 49AAAAA53 <sup>58</sup> , (47-51), (D90-P100)A <sup>32</sup> (90-104) | ++, + |
|          | h44         | 1449             | NTD     | 60                   |                                                                                                             |       |

  

| tRNA     |         | aPelota |         | Mutation                                          |            |
|----------|---------|---------|---------|---------------------------------------------------|------------|
| Position | Residue | Domain  | Residue | Residue **                                        | Effect *** |
| P site   | 1       | ce      | 172-174 | 174KKK176 to 174AAA176 <sup>58,59</sup> (174-176) | +          |
|          | 68      | ce      | 163-164 |                                                   |            |
|          | 73      | ce      | 172     |                                                   |            |

  

| ABCE1  |                  | aPelota |                   | Mutation                     |            |
|--------|------------------|---------|-------------------|------------------------------|------------|
| Domain | Residue          | Domain  | Residue           | Residue **                   | Effect *** |
| FeS    | 30-31, 33-34, 58 | CTD     | 283, 285, 344-345 | Y300A <sup>32,59</sup> (283) | +          |

| Ribosome |         | aABCE1 |         | Mutation   |            |
|----------|---------|--------|---------|------------|------------|
| Protein  | Residue | Domain | Residue | Residue ** | Effect *** |
| LSU      | L14     |        | H1      | 324-327    |            |
|          | L9      | 96     | NBD2    | 434-435    |            |

| Ribosome |             | aABCE1  |         | Mutation      |                           |      |
|----------|-------------|---------|---------|---------------|---------------------------|------|
| RNA      | Nucleotide* | Domain  | Residue | Residue **    | Effect ***                |      |
| SSU      | h5          | 51      | NBD1    | 149           | L152A' (150)              | -    |
|          | h8          | 144-145 | H2      | 576-579, 582  | S588E' (576)              | ++   |
|          | h14         | 339-341 | H1      | 302, 304      | R311E' (304)              | ++   |
|          |             |         | H2      | 563, 572, 575 | R573E' (563)              | ++   |
|          | h15         | 363-364 | NBD1    | 146-149       | R148A', L152A' (146, 149) | -, - |

| aPelota |                   | aABCE1 |                  | Mutation                                                                              |            |
|---------|-------------------|--------|------------------|---------------------------------------------------------------------------------------|------------|
| Domain  | Residue           | Domain | Residue          | Residue **                                                                            | Effect *** |
| CTD     | 283, 285, 344-345 | FeS    | 30-31, 33-34, 58 | C29S/A' <sup>9</sup> , C54S <sup>8</sup> , $\Delta$ FeS <sup>8</sup> , (29, 58, 1-78) | -, -, ++   |

\* *P. furiosus* numbering

\*\* Numbers in brackets indicate the corresponding residues for aPelota (*T. kodakarensis*) and aABCE1 (*P. furiosus*)

\*\*\* Effect reads as: - no effect    + mild effect    ++ strong effect

## Supplementary Movies

### Movie 1: Domain movement of Pelota central domain stabilized by ABCE1 - yeast

The movie shows the crown view on the 60S ribosomal subunit of *S. cerevisiae* with isolated densities of P-site tRNA, Dom34, Hbs1 and Rli1 and the fitted molecular models. After dissociation of Hbs1 and binding of Rli1 the central domain of Dom34 is stabilized in a rotated conformation contacting the P- site tRNA.

### Movie 2: Domain movement of Pelota central domain stabilized by ABCE1 - archaea

The movie shows the crown view on the 50S ribosomal subunit of *P. furiosus* with isolated densities of P-site tRNA, E-site tRNA aPelota and aABCE1 and the fitted molecular models. After dissociation of aEF1 $\alpha$  and binding of aABCE1 the central domain of aPelota is stabilized in a rotated conformation contacting the P-site tRNA.

### Movie 3: Conformational transition of ABCE1

The movie shows the morphing of the aABCE1 conformations starting with the open (ADP-bound) conformation via the intermediate ribosome-bound conformation into the closed (ATP-bound) conformation.

## Supplementary References

- 58 Passos, D. *et al.* Analysis of Dom34 and Its Function in No-Go Decay. *Mol. Biol. Cell* **20**, 3025-3032 (2009).
- 59 van den Elzen, A. M. G. *et al.* Dissection of Dom34-Hbs1 reveals independent functions in two RNA quality control pathways. *Nat. Struct. Mol. Biol.* **17**, 1446-U1474 (2010).
